# Supplementary material for: Spontaneous formation of micrometer-scale liquid crystal droplet patterns on solid surfaces and their sensing applications
Source: Royal Society of Chemistry journal article supplement (doi:10.1039/c3sm00002h), 2013-01-01
Supplement: c3sm00002h.pdf [file c3sm00002h.pdf]

**Supporting Information for**  
**Spontaneous formation of micrometer-scale liquid crystal droplet**  
**patterns on solid surfaces and their sensing applications**

**Qiong-Zheng Hu and Chang-Hyun Jang\***

*Department of Chemistry, Gachon University, Sujeong-Gu, Seongnam-Si, Gyeonggi-Do,  
461-701, Korea*

---

\*Corresponding author. Tel. +82-31-750-8555

*E-mail address: [chjang4u@gachon.ac.kr](mailto:chjang4u@gachon.ac.kr)*

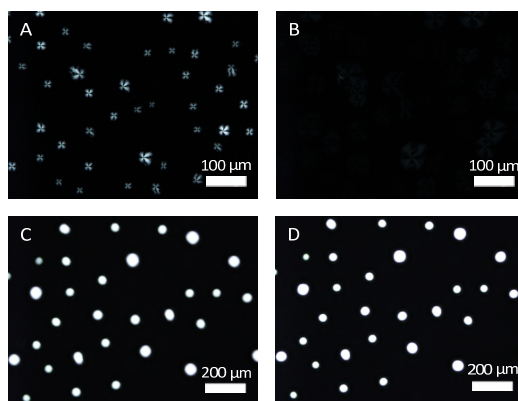

**Fig. S1** Polarized light microscopy images of LC droplet patterns on the piranha-treated glass incubated in prepared water vapors for (A) 0 h, and (B) 4 h; Optical images under crossed polarizers of LC droplet patterns on the OTS-treated glass incubated in prepared water vapors for (C) 0 h, and (D) 12 h.
